# Supplementary material for: Downregulation by lipopolysaccharide of Notch signaling, via nitric oxide
Source: Oxford University Press journal article supplement (doi:10.1242/jcs.019018), 2008-04-15
Supplement: jcs019018-sup-019018-figs1.pdf [file jcs019018-sup-019018-figs1.pdf]

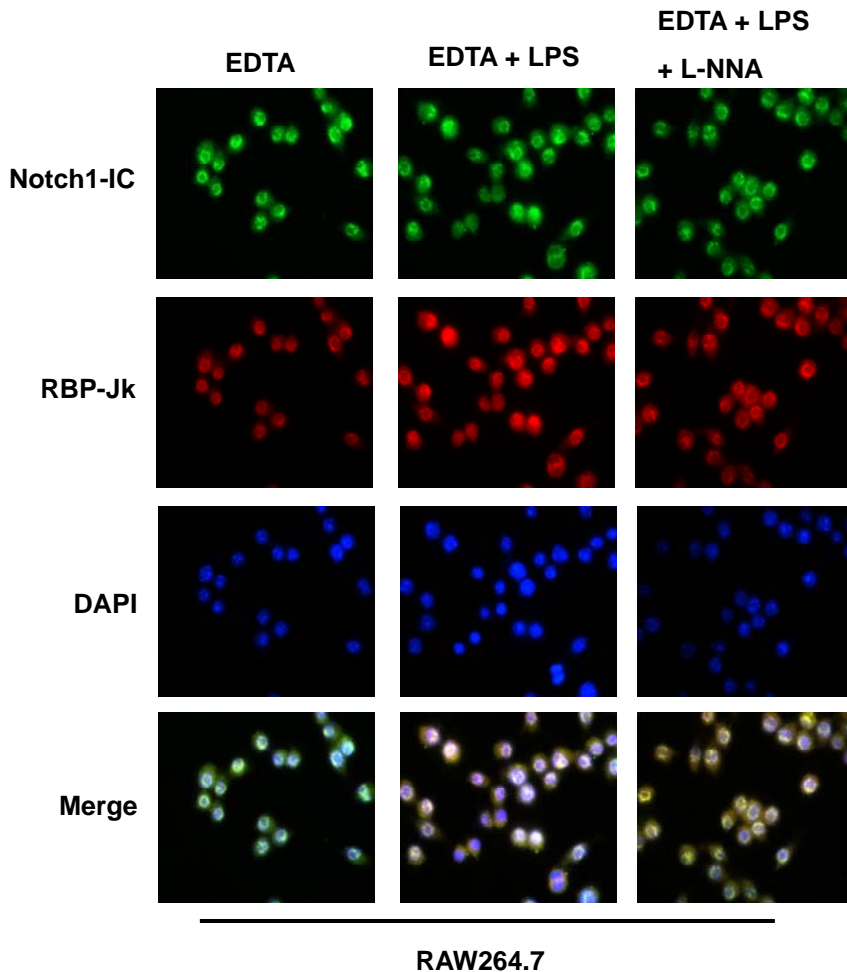

**Supplemental Figure S1. NO has no effect on Notch1-IC and RBP-Jk subcellular localization.**

RAW264.7 cells growing on slides were pretreated with 2 mM L-NNA for 30 min and then exposed to 5 µg/ml LPS for 24 hr. After pretreatment, cells were exposed to 0.5 mM EDTA for 15 min at 37°C, allowed to recover in complete media for 2 hr and then fixed and co-stained with antibodies to Notch1-IC (Green) and RBP-Jk (Red).
